# Supplementary material for: Effects of the surface polarity of nanomaterials on their interaction with complement protein gC1q
Source: Royal Society of Chemistry journal article supplement (doi:10.1039/d0ra05493c), 2020-01-01
Supplement: d0ra05493c1.pdf [file d0ra05493c1.pdf]

## **Supplemental Information**

### **Effects of the surface polarity of nanomaterials on their interaction with complement protein gC1q**

Shuai Wang,<sup>a,b</sup> Xinwen Ou,<sup>b</sup> Yanee Wutthinitikornkit,<sup>b</sup> Ming Yi,<sup>\*a,c</sup> Jingyuan Li<sup>\*b</sup>

Table S1. Partial charges,  $\sigma$  and  $\epsilon$  for atoms in epoxy and hydroxyl groups of GO.

| Functional group | Atom | Charge (e) | $\sigma$ (nm) | $\epsilon$ (kJ·mol <sup>-1</sup> ) |
|------------------|------|------------|---------------|------------------------------------|
| Hydroxyl         | C    | 0.150      | 0.355         | 0.293                              |
|                  | O    | -0.585     | 0.307         | 0.711                              |
|                  | H    | 0.435      | 0.000         | 0.000                              |
| Epoxy            | C    | 0.200      | 0.350         | 0.276                              |
|                  | O    | -0.400     | 0.290         | 0.586                              |

Table S2. Number of residues on the surface of the ghB and ghC modules.

| Binding module | Positively charged | Negatively charged | Polar | Non-polar |
|----------------|--------------------|--------------------|-------|-----------|
| ghB module     | 14                 | 8                  | 21    | 18        |
| ghC module     | 9                  | 7                  | 24    | 27        |

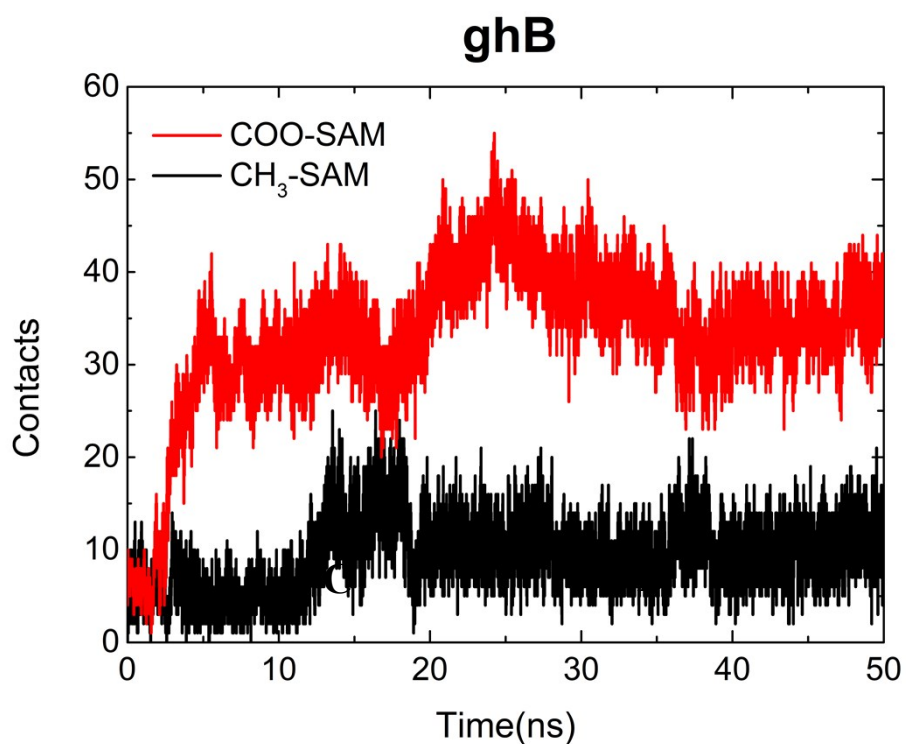

Fig. S1. The number of contact heavy atoms of gC1q (ghB) with SAMs with two different surfaces (i.e., CH<sub>3</sub>-SAM, COO-SAM).

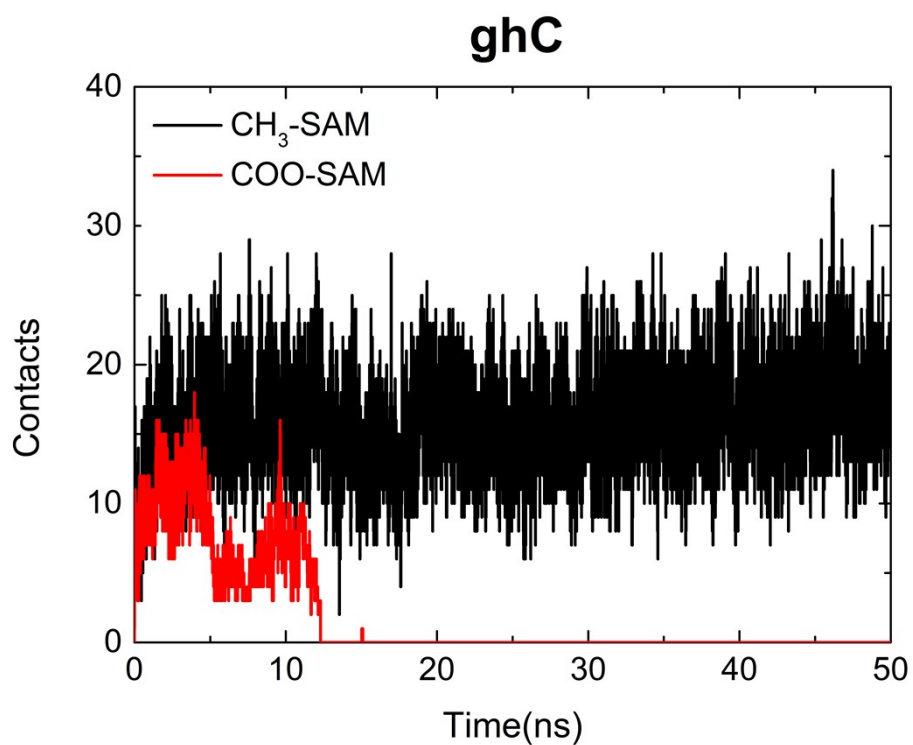

Fig. S2. The number of contact heavy atoms of gC1q (ghC) with SAMs with two different surfaces (i.e., CH<sub>3</sub>-SAM, COO-SAM).
